# Supplementary material
Source: PubMed Central journal article supplement (PMC3433843)
Supplement: NIHMS396203-supplement-Supplement1.pdf [file NIHMS396203-supplement-Supplement1.pdf]

## Supplementary Appendix

This appendix has been provided by the authors to give readers additional information about their work.

Supplement to: Wei JT, Nygaard I, Richter HE, et al. A midurethral sling to reduce incontinence after vaginal prolapse repair. *N Engl J Med* 2012;366:2358-67.

## **Supplementary Appendix**

Supplement to: Wei J, Nygaard I, Richter H, et al. Use of a Midurethral Sling to Prevent Urinary Incontinence Among Women Undergoing Vaginal Prolapse Repair

### **Contents**

|                                                                                             |         |
|---------------------------------------------------------------------------------------------|---------|
| Table 1 - Definition of primary study endpoints                                             | Page 1  |
| Table 2 - Expanded demographics and baseline characteristics<br>by treatment group          | Page 2  |
| Table 3 - Demographics and Baseline Characteristics<br>by cohort                            | Page 5  |
| Table 4 - Additional Patient Reported Outcomes<br>by Treatment Group                        | Page 8  |
| Table 5 - Likelihood of incontinence by preoperative<br>Prolapse reduction stress test      | Page 10 |
| Table 6 - Proportion with urinary incontinence endpoint<br>in the patient preference cohort | Page 11 |
| Table 7 - Serious adverse events by body system                                             | Page 12 |
| Table 8 - Unexpected adverse events by body system                                          | Page 14 |
| Acknowledgments                                                                             | Page 15 |

Supplementary Table 1. **Primary Study Endpoints.**

|                                                                                                                         |                                                    |
|-------------------------------------------------------------------------------------------------------------------------|----------------------------------------------------|
| I.                                                                                                                      | 3-month urinary incontinence or treatment          |
| endpoint was met if any of the following were present:                                                                  |                                                    |
| A.                                                                                                                      | Endorsement of any of the following questions      |
| from the PFDI with at least a moderate degree of bother:                                                                |                                                    |
| 1.                                                                                                                      | Do you usually experience urine leakage related to |
| coughing, sneezing, or laughing?                                                                                        |                                                    |
| 2.                                                                                                                      | Do you usually experience urine leakage related to |
| physical exercise such as walking, running, aerobics, or tennis?                                                        |                                                    |
| 3.                                                                                                                      | Do you usually experience urine leakage related to |
| lifting or bending over?                                                                                                |                                                    |
| 4.                                                                                                                      | Do you usually experience urine leakage            |
| associated with a feeling of urgency, that is, a strong sensation of needing to go to the bathroom?                     |                                                    |
| B.                                                                                                                      | Positive cough stress test on exam                 |
| C.                                                                                                                      | Need for treatment for any urinary incontinence    |
| after the index surgery (e.g., surgery, collagen injections, supervised pelvic muscle therapy, medication, pessary) for |                                                    |
| any urinary incontinence                                                                                                |                                                    |
| II.                                                                                                                     | 12-month urinary incontinence endpoint was met     |
| if criterion (IA) and/or (IB) above were satisfied.                                                                     |                                                    |

Supplementary Table 2. **Demographics and Baseline Characteristics by Treatment Group (expanded)**

| <b>Variable</b>                          | <b>Sling Group<br/>(N=165)</b> | <b>Sham Group<br/>(N=172)</b> |
|------------------------------------------|--------------------------------|-------------------------------|
| <i>Age, yrs. - mean (SD)</i>             | 63.4 (10.8)                    | 62.2 (10.2)                   |
| <i>Race ‡- no. (%)</i>                   |                                |                               |
| White/Caucasian                          | 143 (87%)                      | 143 (83%)                     |
| Black/African American                   | 10 (6%)                        | 14 (8%)                       |
| Asian                                    | 3 (2%)                         | 2 (1%)                        |
| Amer. Indian/Alaskan Native              | 0 (0%)                         | 1 (1%)                        |
| Other                                    | 9 (5%)                         | 12 (7%)                       |
| <i>Ethnicity- no. (%)</i>                |                                |                               |
| Hispanic                                 | 21 (13%)                       | 27 (16%)                      |
| Non-Hispanic                             | 144 (87%)                      | 145 (84%)                     |
| <i>BMI, kg/m<sup>2</sup> - mean (SD)</i> | 27.8 (4.9)                     | 28.1 (5.5)                    |
| <i>POP, Q Stage §- no. (%)</i>           |                                |                               |
| 2                                        | 45 (27%)                       | 48 (28%)                      |
| 3                                        | 107 (65%)                      | 106 (62%)                     |
| 4                                        | 13 (8%)                        | 18 (10%)                      |
| <i>Income- no. (%)</i>                   |                                |                               |
| <\$15,000                                | 14 (22%)                       | 10 (15%)                      |
| ≥\$15,000 to <\$30,000                   | 17 (27%)                       | 17 (26%)                      |
| ≥\$30,000 to <\$50,000                   | 18 (28%)                       | 18 (28%)                      |

|                                                              |           |           |
|--------------------------------------------------------------|-----------|-----------|
| ≥\$50,000 to <\$70,000                                       | 8 (12%)   | 11 (17%)  |
| ≥\$70,000                                                    | 7 (11%)   | 9 (14%)   |
| <i>Marital Status- no. (%)</i>                               |           |           |
| Married                                                      | 121 (74%) | 101 (63%) |
| Separated/Divorced                                           | 20 (12%)  | 26 (16%)  |
| Widowed                                                      | 20 (12%)  | 27 (17%)  |
| Single/Never Married                                         | 2 (1%)    | 5 (3%)    |
| Other                                                        | 0 (0%)    | 2 (1%)    |
| <i>Education- no. (%)</i>                                    |           |           |
| Less than High School                                        | 17 (10%)  | 26 (16%)  |
| Completed High School or Equivalent                          | 44 (27%)  | 45 (28%)  |
| Some College/Associate Degree                                | 56 (34%)  | 44 (27%)  |
| Completed 4 Year College                                     | 30 (18%)  | 29 (18%)  |
| Graduate/Professional Degree                                 | 16 (10%)  | 17 (11%)  |
| <i>Baseline Stress Test- no. (%)</i>                         |           |           |
| Positive                                                     | 54 (33%)  | 57 (33%)  |
| Negative                                                     | 107 (67%) | 113 (67%) |
| <i>Anterior Vaginal Prolapse Repair<sup>¶</sup>- no. (%)</i> |           |           |
| Anterior Repair Only                                         | 20 (12%)  | 17 (10%)  |
| Apical Suspension Only                                       | 32 (19%)  | 42 (24%)  |

|                                                   |           |           |
|---------------------------------------------------|-----------|-----------|
| Both Anterior and Apical                          | 101 (62%) | 100 (58%) |
| Colpocleisis                                      | 11 (7%)   | 13 (8%)   |
| <i>Posterior Vaginal Prolapse Repair- no. (%)</i> |           |           |
| Yes                                               | 74 (45%)  | 80 (46%)  |
| No                                                | 90 (55%)  | 92 (54%)  |
| Prior Hysterectomy – no. (%)                      | 62 (38%)  | 66 (38%)  |
| Concomitant Hysterectomy – no. (%)                | 82 (50%)  | 83 (48%)  |

All p-values are greater than 0.05.

‡ Race was self-reported and more than one category could have been selected.

§ POP Q stages are ordinal categories based on the lowest point of prolapse with stage 1 (lowest point of prolapse is > 1 cm above hymen), stage 2, (lowest point of prolapse is within 1 cm above or below to the hymen), stage 3 (lowest point of prolapse >1 cm below hymen but protrudes no more than 2 cm less than the total vaginal length) and stage 4 (complete vaginal eversion)

¶ Anterior repairs included paravaginal repairs, colporrhaphy, mesh augmentation and apical suspensions included uterosacral ligament suspension, sacrospinous ligament suspension, McCall culdoplasty, Iliococcygeal repair, Pursestring repair of enterocele, Apical suspension kit.

Supplementary Table 3. **Demographic and Baseline Characteristics by Cohort**

| Variable                       | Group                      |                                    |
|--------------------------------|----------------------------|------------------------------------|
|                                | Randomized Cohort<br>N=337 | Patient Preference Cohort<br>N=129 |
| <i>Age- yrs.</i>               |                            |                                    |
| Mean (SD)                      | 62.8 (10.2)                | 64.4 (10.0)                        |
| <i>Age- no. (%)</i>            |                            |                                    |
| >30 and <=40                   | 9 (2.7%)                   | 1 (0.8%)                           |
| >40 and <=50                   | 23 (6.8%)                  | 7 (5.4%)                           |
| >50 and <=60                   | 90 (26.7%)                 | 34 (26.4%)                         |
| >60 and <=70                   | 144 (42.7%)                | 50 (38.8%)                         |
| >70 and <=80                   | 60 (17.8%)                 | 27 (20.9%)                         |
| >80                            | 11 (3.3%)                  | 10 (7.8%)                          |
| <i>Race †- no. (%)*</i>        |                            |                                    |
| White/Caucasian                | 286 (84.9%)                | 123 (95.4%)                        |
| Black/African American         | 24 (7.1%)                  | 4 (3.1%)                           |
| Asian                          | 5 (1.5%)                   | 1 (0.8%)                           |
| American Indian/Alaskan Native | 1 (0.3%)                   | 0 (0.0%)                           |
| Other                          | 21 (6.2%)                  | 1 (0.8%)                           |
| <i>Ethnicity- no. (%)</i>      |                            |                                    |
| Hispanic                       | 48 (14%)                   | 14 (10.9%)                         |
| Non-Hispanic                   | 289 (86%)                  | 115 (89.2%)                        |
| <i>BMI- kg/m<sup>2</sup></i>   |                            |                                    |
| Mean (SD)                      | 28.0 (5.2)                 | 27.9 (5.3)                         |
| <i>POP, Q Stage §- no. (%)</i> |                            |                                    |
| 2                              | 93 (28%)                   | 44 (34.4%)                         |
| 3                              | 213 (63%)                  | 77 (60.2%)                         |
| 4                              | 31 (9%)                    | 7 (5.5%)                           |
| <i>Income- no. (%)</i>         |                            |                                    |
| <\$15,000                      | 24 (18.6%)                 | 3 (5.7%)                           |
| ≥\$15,000 to <\$30,000         | 34 (26.4%)                 | 17 (32.1%)                         |
| ≥\$30,000 to <\$50,000         | 36 (27.9%)                 | 12 (22.6%)                         |
| ≥\$50,000 to <\$70,000         | 19 (14.7%)                 | 10 (18.9%)                         |
| ≥\$70,000                      | 16 (12.4%)                 | 11 (20.8%)                         |

|                                                      |               |              |
|------------------------------------------------------|---------------|--------------|
| <i>Marital Status- no. (%)</i>                       |               |              |
| Married                                              | 222 (68.5%)   | 78 (63.4%)   |
| Separated/Divorced                                   | 46 (14.2%)    | 21 (17.1%)   |
| Widowed                                              | 47 (14.5%)    | 21 (17.1%)   |
| Single, never married                                | 7 (2.2%)      | 2 (1.6%)     |
| Other                                                | 2 (0.6%)      | 1 (0.8%)     |
| <i>Education- no. (%)</i>                            |               |              |
| Less than high school                                | 43 (13.3%)    | 12 (9.8%)    |
| Completed high school or equivalent                  | 89 (27.5%)    | 28 (22.8%)   |
| Some college/Associate degree                        | 100 (30.9%)   | 34 (27.6%)   |
| Completed 4 years of college                         | 59 (18.2%)    | 26 (21.1%)   |
| Graduate/Professional degree                         | 33 (10.2%)    | 23 (18.7%)   |
| <i>Baseline Stress Test- no. (%)</i>                 |               |              |
| Positive                                             | 111 (33.5%)   | 51 (40.2%)   |
| Negative                                             | 220 (66.5%)   | 76 (59.8%)   |
| <i>Anterior Vaginal Prolapse Repair † - no. (%)*</i> |               |              |
| Anterior repair only                                 | 37 (11.0%)    | 11 (8.5%)    |
| Apical suspension only                               | 74 (22.0%)    | 45 (34.9%)   |
| Both anterior and apical                             | 201 (59.8%)   | 60 (46.5%)   |
| Colpocleisis                                         | 24 (7.1%)     | 13 (10.1%)   |
| <i>Posterior Vaginal Prolapse Repair- no. (%)</i>    | 154 (45.8%)   | 54 (41.9%)   |
| <i>Prior Hysterectomy – no. (%)</i>                  | 128 (38.0)    | 48 (37.5)    |
| <i>Concomitant Hysterectomy – no. (%)</i>            | 165 (49.1)    | 70 (54.3)    |
| <i>Pre-Surgery UI Medication Use- no. (%)</i>        | 15 (4.5%)     | 9 (7.0%)     |
| <i>Estimated Blood Loss- cc</i>                      |               |              |
| Mean (SD)                                            | 156.0 (113.6) | 144.0 (97.7) |
| <i>Operative Time- min.</i>                          |               |              |
| Mean (SD)                                            | 135.3 (52.4)  | 130.4 (47.8) |

\* P<0.05

‡ Race was self-reported and more than one category could have been selected.

§ POP Q stages are ordinal categories based on the lowest point of prolapse with stage 1 (lowest point of prolapse is > 1 cm above hymen), stage 2, (lowest point of prolapse is within 1 cm above or below to the hymen), stage 3 (lowest point of prolapse >1 cm below hymen but protrudes no more than 2 cm less than the total vaginal length) and stage 4 (complete vaginal eversion)



¶ Anterior repairs included paravaginal repairs, colporrhaphy, mesh augmentation and apical suspensions included uterosacral ligament suspension, sacrospinous ligament suspension, McCall culdoplasty, Iliococcygeal repair, Pursestring repair of enterocele, Apical suspension kit.

Supplementary Table 4. **Additional Patient Reported Outcomes by Treatment Group in the Randomized Cohort.**

| Variable <sup>‡</sup>                                          | Treatment Group      |                     | Treatment Difference <sup>†</sup><br>(95%CI) |
|----------------------------------------------------------------|----------------------|---------------------|----------------------------------------------|
|                                                                | Sling Group<br>N=165 | Sham Group<br>N=172 |                                              |
| <i>PFDI Pelvic Organ Prolapse Distress Index (POPDI)</i>       |                      |                     |                                              |
| Change from Baseline to 3 Months                               |                      |                     |                                              |
| No.                                                            | 160                  | 158                 |                                              |
| Mean (SD)                                                      | -74.1 (68.59)        | -74.7 (61.18)       | 0.6 (-13.7, 15.0)                            |
| Change from Baseline to 12 Months                              |                      |                     |                                              |
| No.                                                            | 157                  | 154                 |                                              |
| Mean (SD)                                                      | -73.8 (65.07)        | -74.6 (60.4)        | 0.7 (-13.3, 14.7)                            |
| <i>PFDI Colo-Rectal Anal Distress Index (CRADI)</i>            |                      |                     |                                              |
| Change from Baseline to 3 Months                               |                      |                     |                                              |
| No.                                                            | 157                  | 154                 |                                              |
| Mean (SD)                                                      | -35.6 (66.45)        | -33.0 (65.19)       | -2.5 (-17.2, 12.1)                           |
| Change from Baseline to 12 Months                              |                      |                     |                                              |
| No.                                                            | 157                  | 153                 |                                              |
| Mean (SD)                                                      | -38.2 (63.12)        | -37.9 (63.56)       | -0.3 (-14.5, 13.8)                           |
| <i>PFIQ Urinary Impact Questionnaire (UIQ)</i>                 |                      |                     |                                              |
| Change from Baseline to 3 Months                               |                      |                     |                                              |
| No.                                                            | 153                  | 152                 |                                              |
| Mean (SD)                                                      | -48.4 (75.07)        | -38.3 (71.63)       | -10.1 (-26.7, 6.4)                           |
| Change from Baseline to 12 Months                              |                      |                     |                                              |
| No.                                                            | 151                  | 150                 |                                              |
| Mean (SD)                                                      | -50.3 (71.29)        | -48.0 (65.89)       | -2.4 (-18.0, 13.2)                           |
| <i>PFIQ Pelvic Organ Prolapse Impact Questionnaire (POPIQ)</i> |                      |                     |                                              |
| Change from Baseline to 3 Months                               |                      |                     |                                              |
| No.                                                            | 154                  | 152                 |                                              |
| Mean (SD)                                                      | -57.1 (79.38)        | -47.0 (73.91)       | -10.0 (-27.3, 7.2)                           |
| Change from Baseline to 12 Months                              |                      |                     |                                              |
| No.                                                            | 152                  | 150                 |                                              |
| Mean (SD)                                                      | -57.6 (79.23)        | -51.6 (70.88)       | -6.1 (-23.1, 11.0)                           |

*PFIQ Colo-Rectal Anal Impact Questionnaire (CRAIQ)*

Change from Baseline to 3 Months

|           |               |               |                   |
|-----------|---------------|---------------|-------------------|
| No.       | 153           | 152           |                   |
| Mean (SD) | -22.8 (59.16) | -19.2 (59.82) | -3.6 (-17.0, 9.8) |

Change from Baseline to 12 Months

|           |               |               |                    |
|-----------|---------------|---------------|--------------------|
| No.       | 151           | 150           |                    |
| Mean (SD) | -24.9 (65.71) | -24.3 (64.21) | -0.6 (-15.3, 14.2) |

*PISQ-12 Total Score*

Change from Baseline to 3 Months

|           |            |            |                  |
|-----------|------------|------------|------------------|
| No.       | 57         | 48         |                  |
| Mean (SD) | 2.8 (4.56) | 3.2 (5.32) | -0.4 (-2.3, 1.5) |

Change from Baseline to 12 Months

|           |            |            |                 |
|-----------|------------|------------|-----------------|
| No.       | 66         | 52         |                 |
| Mean (SD) | 4.0 (4.93) | 3.5 (4.30) | 0.5 (-1.2, 2.2) |

*Average Weekly Pain*

Change from Baseline to 3 Months

|           |             |             |                  |
|-----------|-------------|-------------|------------------|
| No.       | 159         | 158         |                  |
| Mean (SD) | -1.4 (2.53) | -1.2 (2.45) | -0.2 (-0.8, 0.3) |

Change from Baseline to 12 Months

|           |             |             |                  |
|-----------|-------------|-------------|------------------|
| No.       | 156         | 154         |                  |
| Mean (SD) | -1.7 (2.61) | -1.4 (2.47) | -0.3 (-0.9, 0.3) |

† All p-values greater than 0.05

‡ Pelvic Floor Distress Inventory POPDI domain (range 0-300 with higher score indicating more symptoms); Pelvic Floor Distress Inventory CRADI domain (range 0-400 with higher score indicating more symptoms); Pelvic Floor Impact Questionnaire domains (range 0-400 with higher score indicating greater impact); Pelvic Organ Prolapse/Urinary Incontinence Sexual Functioning Questionnaire Short Form (range 0-48 with higher score better sexual function); analogue pain scale adapted for suprapubic pain (range 0-10 with higher score indicating more pain)

Supplementary Table 5. Likelihood of Incontinence at 3 months Stratified by Preoperative Prolapse Reduction

Stress Test in the Randomized Cohort.

| Baseline Stress Test <sup>†</sup> | Treatment Group                     |                                    |                |
|-----------------------------------|-------------------------------------|------------------------------------|----------------|
|                                   | Prolapse Repair plus Sling<br>N=165 | Prolapse Repair plus Sham<br>N=172 | All            |
|                                   | <b>3 month endpoint</b>             |                                    |                |
| Positive                          | 16/54 (29.6%)                       | 41/57 (71.9%)                      | 57/111 (51.4%) |
| Negative                          | 22/107 (20.6%)                      | 43/113 (38.1%)                     | 65/220 (29.5%) |
|                                   | <b>12 month endpoint</b>            |                                    |                |
| Positive                          | 19/54 (35.2%)                       | 34/57 (59.7%)                      | 53/111 (44.7%) |
| Negative                          | 30/107 (28.0%)                      | 46/113 (40.7%)                     | 76/220 (34.5%) |

† Positive Stress Tests: the bladder is filled retrograde to 300 ml, (at baseline, the prolapse was replaced inside the vagina using one or two large swabs). If the woman demonstrates leakage with coughing or straining in either the supine or standing position, the test is considered positive. P-value is 0.06 at 3 months and 0.16 at 12 months based on test of interaction between stress test and treatment group from model, stratifying by surgeon, and controlling for type of prolapse repair procedure (colpocleisis, apical suspension and/or anterior repair).

Supplementary Table 6. **Proportion with Urinary Incontinence (UI) Endpoints at 3 and 12 Months in the Patient**

| <b>Preference Cohort<sup>†</sup></b>                       |                               |                                            |                                              |                                                                     |
|------------------------------------------------------------|-------------------------------|--------------------------------------------|----------------------------------------------|---------------------------------------------------------------------|
| <b>Study Endpoint</b>                                      | <b>Sling Group<br/>(N=64)</b> | <b>Prolapse Repair<br/>Only<br/>(N=65)</b> | <b>Treatment<br/>Difference<br/>(95% CI)</b> | <b>Adjusted Odds<br/>Ratio<br/>(95% CI)</b>                         |
| <b>UI/Treatment at 3 Months<sup>†</sup>-<br/>no. (%)</b>   | 14/64 (21.9%)                 | 30/65 (46.2%)                              | -24.3%^<br>(-40.6%, -7.9%)                   | 0.31*<br>(0.11, 0.86)                                               |
| <b>Positive Cough Stress Test<sup>‡</sup>-<br/>no. (%)</b> | 2/58 (3.5%)                   | 14/55 (25.5%)                              | -22% ***<br>(-34.9, -9.1)                    |                                                                     |
| <b>Symptoms<sup>§</sup>- no. (%)</b>                       | 4/62 (6.5%)                   | 5/61 (8.2%)                                | -1.7%<br>(-10.9, 7.5)                        |                                                                     |
| <b>UI Treatments<sup>¶</sup>- no. (%)</b>                  | 4/64 (6.3%)                   | 7/65 (10.8%)                               | -4.5%<br>(-14.2, 5.1)                        |                                                                     |
| <b>UI at 12 Months<sup>†</sup> - no. (%)</b>               | 17/64 (26.6%)                 | 30/65 (46.2%)                              | -19.6%^<br>(-36.2%, -3.0%)                   | <b>Adjusted Odds<br/>Ratio<br/>(95% CI)</b><br>0.54<br>(0.21, 1.39) |
| <b>Positive Cough Stress Test<sup>‡</sup>-<br/>no. (%)</b> | 2/54 (3.7%)                   | 13/50 (26%)                                | -22.3% **<br>(-35.8, -8.8)                   |                                                                     |
| <b>Symptoms<sup>§</sup>- no. (%)</b>                       | 3/56 (5.4%)                   | 5/60 (8.3%)                                | -3.0%<br>(-12.2, 6.3)                        |                                                                     |

\* P<0.05; \*\* P<0.01; \*\*\* P<0.001; ^not done

<sup>†</sup>3 Month endpoint includes any positive cough stress tests, symptoms, or additional urinary incontinence treatment whereas 12 month endpoint includes positive cough stress tests or symptoms only. P-value from model, stratifying by surgeon, and controlling for type of prolapse repair procedure (colpocleisis, apical suspension and/or anterior repair).

<sup>‡</sup> Positive Stress Tests: Leakage of urine with coughing or straining in either the supine or standing position with the bladder filled retrograde to 300 ml.

<sup>§</sup> Symptoms: of UI that are also characterized as being at least moderately bothersome to the subject (as measured by a “moderately” or “quite a bit” response to any of the four items from the Pelvic Floor Distress Inventory regarding leakage).

<sup>¶</sup> UI Treatment: need for treatment for any urinary incontinence including surgery, UI medication, pessary for incontinence, supervised pelvic muscle exercises, timed voiding & fluid management, periurethral injection, botulinum injection, neuromodulation, or other treatment for incontinence.

Supplementary Table 7. Serious Adverse Events by Body System †

| Body System                          | Treatment Group    | SAE Description                                                      |
|--------------------------------------|--------------------|----------------------------------------------------------------------|
| <i>Cardiovascular</i>                | Sling              | Arrhythmia                                                           |
|                                      | Sling              | Congestive heart failure                                             |
|                                      | Sling              | Decreased pulse, abnormal EKG                                        |
|                                      | Sham               | Post-operative hypoxia and hypotension                               |
|                                      | Sham               | Dizziness                                                            |
|                                      | Sham               | Chest pain                                                           |
| <i>Cardiovascular and Urological</i> | Sling              | Fluid overload, shortness of breath, urinary tract infection         |
| <i>GI</i>                            | Sling              | Dehydration and diarrhea                                             |
|                                      | Sling              | Surgery for recurrent rectal prolapse                                |
|                                      | Sling              | Acute appendicitis                                                   |
|                                      | Sling              | Acute ischemic colitis                                               |
|                                      | Sling              | Nausea and vomiting secondary to Percocet, requiring hospitalization |
|                                      | Sling              | Diverticulitis                                                       |
|                                      | Sling              | Small bowel obstruction                                              |
|                                      | Sling              | Appendicitis                                                         |
|                                      | Sham               | Post-operative nausea and vomiting                                   |
|                                      | Sham               | Rectal prolapse                                                      |
|                                      | Sham               | Small bowel obstruction                                              |
|                                      | <i>Gynecologic</i> | Sling                                                                |
| Sling                                |                    | Rectocele repair                                                     |
| Sling                                |                    | Surgery for recurrent vaginal vault prolapse <sup>‡</sup>            |
| Sling                                |                    | Surgery for recurrent pelvic organ prolapse                          |
| Sling                                |                    | Surgery for recurrent pelvic organ prolapse                          |
| Sling                                |                    | Surgery for recurrent apical prolapse                                |
| Sham                                 |                    | Surgery for recurrent pelvic organ prolapse                          |
| <i>Hematologic/Bleeding</i>          | Sling              | Intraoperative retropubic hematoma <sup>‡</sup>                      |
|                                      | Sling              | Post-operative hemorrhage                                            |
|                                      | Sling              | Post-operative anemia                                                |
| <i>Miscellaneous</i>                 | Sham               | Goiter                                                               |
| <i>Musculoskeletal</i>               | Sling              | Hip Replacement                                                      |
|                                      | Sling              | Knee fracture                                                        |

|                     |       |                                                |
|---------------------|-------|------------------------------------------------|
|                     | Sling | Total knee replacement                         |
|                     | Sham  | Knee replacement                               |
|                     | Sham  | Hip degenerative joint disease                 |
|                     | Sham  | Lumbar stenosis                                |
|                     | Sham  | Arthritis both knees with valgus deformity     |
| <i>Neoplastic</i>   | Sham  | Colon cancer                                   |
|                     | Sham  | Colon cancer                                   |
|                     | Sham  | Abnormal mammogram malignant right breast      |
| <i>Neurological</i> | Sling | Post-operative pain                            |
|                     | Sling | Herniated disc                                 |
|                     | Sling | Leg pain                                       |
|                     | Sham  | Transient ischemic attack                      |
| <i>Pulmonary</i>    | Sling | Spontaneous pneumothorax                       |
| <i>Urological</i>   | Sling | Kidney stone, urinary tract infection          |
|                     | Sham  | Pyelonephritis <sup>‡</sup>                    |
|                     | Sham  | Stitch abscess, pelvic pain, urinary frequency |
| <i>Wound</i>        | Sling | Post-operative vaginal edge bleeding           |
|                     | Sham  | Post-operative vaginal edge bleeding           |
|                     | Sham  | Post-operative vaginal bleeding                |
|                     | Sham  | Vaginal cuff abscess                           |
|                     | Sham  | Abscess                                        |

† Serious adverse events: Any untoward medical occurrence (whether or not related to index surgery) that resulted in death, is life threatening, requires inpatient hospitalization, results in persistent or significant disability or incapacity, in a congenital anomaly/birth defect, or is another medically important condition

‡ SAE that is plausibly related to mid-urethral sling as determined by independent adjudication committee. Using Fisher's exact test, there was no differences in the occurrence of plausibly related SAEs between Sling and Sham groups (p=0.62)

Supplementary Table 8. Unexpected Adverse Events by Body system<sup>†</sup>

| Body System            | Treatment Group | SAE Description                                                                                    |
|------------------------|-----------------|----------------------------------------------------------------------------------------------------|
| <i>GI</i>              | Sling           | Planned laparoscopic assisted vaginal hysterectomy unable to be performed due to adhesive disease. |
|                        | Sling           | Rectal proctotomy                                                                                  |
|                        | Sling           | Constipation                                                                                       |
|                        | Sham            | Constipation                                                                                       |
| <i>Gynecologic</i>     | Sham            | Vaginal adhesions                                                                                  |
|                        | Sham            | Mesh complication                                                                                  |
| <i>Infection</i>       | Sham            | Methicillin resistant staphylococcus infection                                                     |
| <i>Miscellaneous</i>   | Sham            | Fatigue                                                                                            |
|                        | Sham            | Lost needle                                                                                        |
|                        | Sham            | Scabies                                                                                            |
| <i>Musculoskeletal</i> | Sham            | Hip fracture                                                                                       |
| <i>Neurological</i>    | Sling           | Pain                                                                                               |
|                        | Sling           | Pain                                                                                               |
|                        | Sham            | Inguinal nerve injury                                                                              |
|                        | Sham            | Vestibulitis                                                                                       |
|                        | Sham            | Pain                                                                                               |
|                        | Sham            | Nerve pain                                                                                         |
| <i>Urological</i>      | Sling           | Ureteral injury <sup>‡</sup>                                                                       |
|                        | Sham            | Ureteral injury <sup>‡</sup>                                                                       |
|                        | Sham            | Ureteral injury <sup>‡</sup>                                                                       |
|                        | Sham            | Ureteral injury <sup>‡</sup>                                                                       |
| <i>Wound</i>           | Sling           | Granulation                                                                                        |
|                        | Sham            | Intraoperative vaginal bleeding                                                                    |

<sup>†</sup> Unexpected adverse events: Any other untoward event that is not qualified as an expected adverse event (as listed in manuscript Table 4)

<sup>‡</sup> Transient ureteral obstruction diagnosed during cystoscopy in the operating room, which was resolved with removal of uterosacral suspension sutures



## **OPUS Primary Analysis Manuscript Acknowledgments**

### **Pelvic Floor Disorders Network:**

#### **Cleveland Clinic**

Mathew D. Barber, MD, MHS, Principal Investigator

Marie Fidela R. Paraiso, MD, Co-Investigator

Mark D. Walters, MD, Co-Investigator

J. Eric Jelovsek, MD, Co-Investigator

Linda McElrath, RN, Research Nurse Coordinator

Donel Murphy, RN, MSN, Research Nurse

Cheryl Williams, Research Assistant

#### **Duke University**

Anthony G. Visco, MD, Principal Investigator

Jennifer Wu, MD, Co-Investigator

Alison Weidner, MD, Co-Investigator

Cindy Amundsen, MD, Co-Investigator

Mary J. Loomis, RN, BSN, Research Coordinator

#### **Loyola University**

Linda Brubaker, MD, MS, Principal Investigator

Kimberly Kenton, MD, MS, Investigator

MaryPat FitzGerald, MD, MS, Investigator

Elizabeth Mueller, MD, MSME, Investigator

Mary Tulke, RN, Research Nurse Coordinator

Kathy Jesse, RN, Research Nurse Coordinator

Kathy Marchese, RN, Research Nurse Coordinator

**University of Alabama at Birmingham**

Holly E. Richter, PhD, MD, Principal Investigator

Kathryn L. Burgio, PhD, Co-Principal Investigator

R. Edward Varner, MD, Co-Investigator

Robert L. Holley, MD, Co-Investigator

W. Jerod Greer, MD, Co-Investigator

Patricia S. Goode, MD, Co-Investigator

L. Keith Lloyd, MD, Co-Investigator

Alayne D. Markland, DO, Co-Investigator

Tracey Wilson, MD, Co-Investigator

Velria Willis, RN, BSN, Research Nurse Coordinator

Nancy Saxon, BSN, Research Nurse Clinician

LaChele Ward, LPN, Research Specialist

Lisa S. Pair, CRNP

**University of California, San Diego and Kaiser Permanente, San Diego**

Charles W. Nager, MD Principal Investigator

Shawn A. Menefee, MD, Co- Investigator

Emily Lukacz, MD, Co-Investigator

Margie Kahn, MD, Co-Investigator

Karl M. Lubber, MD, Co-Investigator

Leah Merrin, Research Coordinator

Giselle Zazueta-Damian, Research Coordinator

Patsy Riley, R.N.

Lynn Hall, R.N.

Judy M. Condino, RN

**University of Michigan**

Cathie Spino, DSc, Principal Investigator

John T. Wei, MD, MS, Co-Principal Investigator

Morton B. Brown, PhD, Co-Investigator

Donna DiFranco, BS, Clinical Monitor

John O.L. DeLancey, MD, Co-Investigator

Dee Fenner, MD, Co-Investigator

Nancy K. Janz, PhD, Co-Investigator

Zhen Chen, MS, Statistician

Fang Xiang, Statistician

Yang Wang Casher, MS, Database Programmer

**University of Texas, Southwestern**

Joseph Schaffer MD, Principal Investigator

David Rahn, MD, Co-Investigator

Clifford Wai, MD, Co-Investigator

Marlene Corton, MD, Co-Investigator

Gary Lemack, MD, Co-Investigator

Philippe Zimmern, MD Co-Investigator

Kelly Moore - Research Coordinator

Shanna Atnip, NP

Margaret Hull, NP

Pam Martinez, NP

Deborah Lawson, NP

**University of Utah**

Ingrid Nygaard, MD, Principal Investigator

Peggy Norton, MD, Co-Investigator

Yvonne Hsu, MD, Co-Investigator

Linda Freeman, RN, Research Coordinator

**Steering Committee Chair**

Katherine E. Hartmann, MD, PhD

**NIH Project Scientist**

Susan Meikle, MD, MSPH
